# Supplementary material
Source: Research Square preprint supplement (doi:10.21203/rs.3.rs-9498384/v1)
Supplement: Supplementary file 1 [file 58d2be8d6758da2401bdce58.docx]

**Supplementary Material 1.**

| **Coding Tree** | | |
| --- | --- | --- |
| **Themes** | **Axial Themes** | **Codes** |
| **Barriers to access healthcare** | **Discrimination against the transgender community** | Discrimination at homes |
| Discrimination in public places |
| difficulty in completing their education |
| Difficulty in finding jobs irrespective of their educational status |
| Difficulty in finding places to stay. |
| Discrimination at hospital by other patients. |
| **Financial Constraints** | money paid to overcome the discrimination |
| depend on private finances |
| dictate the type of hospitals |
| change to a government hospital for tests |
| **Rural-Urban Differences** | non-functioning / mal-functioning equipment in rural government hospital |
| Distance of hospital |
| **Negative attitude of healthcare workers towards them** | Mocked at for dressing  style. |
| Improper communication |
| Body autonomy being disrespected |
| Being laughed at by HCWs |
| Faux untouchability |
| Refusal of treatment |
| **Documentation and infrastructural complexities** | Government IDs showing sex assigned at birth |
| Wrong assignment of wards |
| Complexity of navigating healthcare infrastructure |
| **Poor awareness about government schemes and the health needs of the community.** | Poor awareness in community about government schemes |
| Poor awareness among government officials about government schemes |
| Poor awareness of HCW about health needs |
| **Discrimination Within The Community.** | Casteism |
| Internalised Transphobia |
| **Enablers to access healthcare** | **Respectful treatment and examination** | Touch and examine |
| Non-discrimination |
| **Positive gestures** | Smile |
| **Support System** | Community support |
| **Government Policies** | Inclusion of third gender |
| **Inclusive Intake** | Intake of patients of all genders at hospitals |
| **Health Demands of the participants** | **Separate hospitals/spaces/doctors** | Separate doctors |
| Separate spaces |
| Separate hospitals |
| **Support for education** | Education of the community |
| **Representation in healthcare workforce** | Transgender doctor |
| **Free/ affordable gender-affirming care** | Free hormone therapy |
| Laser hair removal at govt hospitals |
| Free silicon breast implants |
